# Supplementary material for: Diluting concentrated solution: a general, simple and effective approach to enhance efficiency of polymer solar cells
Source: Royal Society of Chemistry journal article supplement (doi:10.1039/c5ee01838b), 2015-01-01
Supplement: c5ee01838b1.pdf [file c5ee01838b1.pdf]

Electronic Supplementary Information For:

**Diluting concentrated solution: A general, simple and effective approach to enhance efficiency of polymer solar cells**

Pei Cheng,<sup>a,d</sup> Cenqi Yan,<sup>b</sup> Yongfang Li,<sup>a</sup> Wei Ma,<sup>\*c</sup> and Xiaowei Zhan<sup>\*b</sup>

*<sup>a</sup>Beijing National Laboratory for Molecular Sciences and CAS Key Laboratory of Organic Solids, Institute of Chemistry, Chinese Academy of Sciences, Beijing 100190, China.*

*<sup>b</sup>Department of Materials Science and Engineering, College of Engineering, Key Laboratory of Polymer Chemistry and Physics of Ministry of Education, Peking University, Beijing 100871, China. E-mail: xwzhan@pku.edu.cn*

*<sup>c</sup>State Key Laboratory for Mechanical Behavior of Materials, Xi'an Jiaotong University, Xi'an 710049, China*

*<sup>d</sup>University of Chinese Academy of Sciences, Beijing 100049, China.*

## 1. Molecular structures

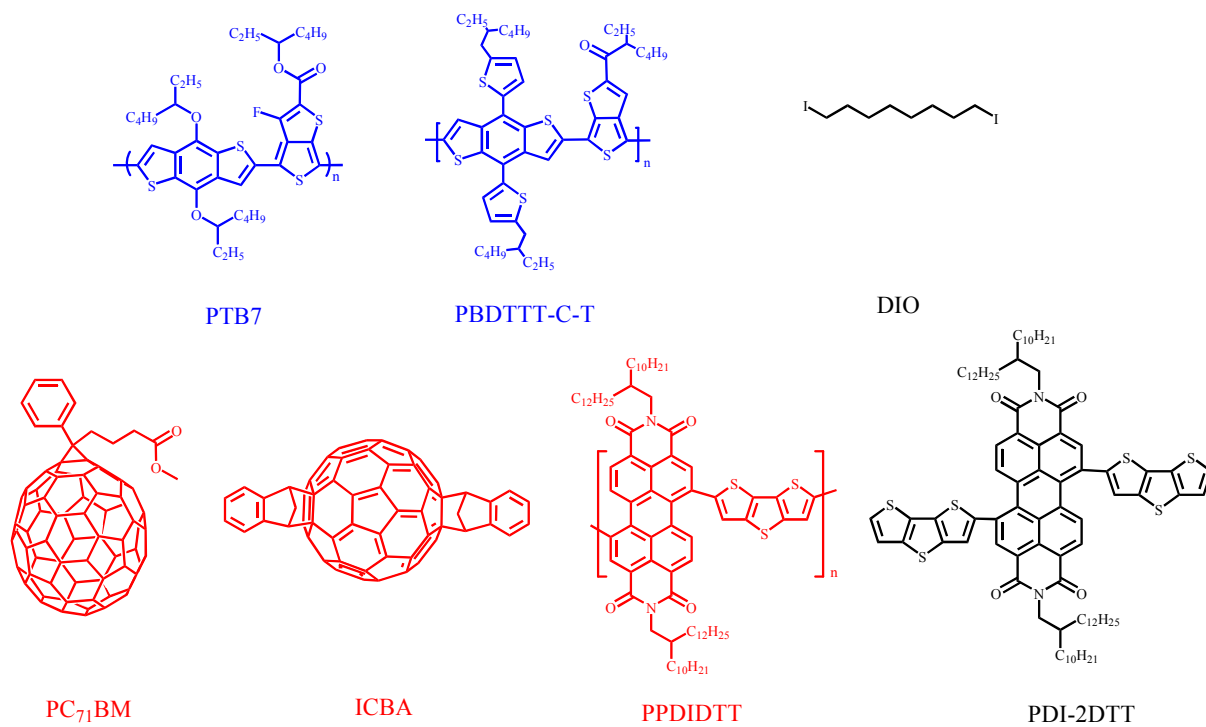

**Fig. S1** Molecular structures of PTB7, PBDTTT-C-T, PC<sub>71</sub>BM, ICBA, PPIDTT, DIO and PDI-2DTT.

## 2. Photovoltaic properties with different processing time

**Table S1** Average PCEs for different processing time

| Active layer                  | Polymer concentration<br>(mg/ml) | Time 1 (h) <sup>a</sup> | Time 2 (h) <sup>b</sup> | PCE (%) |
|-------------------------------|----------------------------------|-------------------------|-------------------------|---------|
| PTB7:ICBA:PC <sub>71</sub> BM | 70                               | 8                       | 2                       | 8.39    |
| PTB7:ICBA:PC <sub>71</sub> BM | 70                               | 8                       | 3                       | 8.52    |
| PTB7:ICBA:PC <sub>71</sub> BM | 70                               | 8                       | 4                       | 8.56    |
| PTB7:ICBA:PC <sub>71</sub> BM | 70                               | 12                      | 2                       | 8.55    |
| PTB7:ICBA:PC <sub>71</sub> BM | 70                               | 12                      | 3                       | 8.73    |
| PTB7:ICBA:PC <sub>71</sub> BM | 70                               | 12                      | 4                       | 8.71    |
| PTB7:ICBA:PC <sub>71</sub> BM | 70                               | 16                      | 2                       | 8.61    |
| PTB7:ICBA:PC <sub>71</sub> BM | 70                               | 16                      | 3                       | 8.70    |
| PTB7:ICBA:PC <sub>71</sub> BM | 70                               | 16                      | 4                       | 8.72    |

<sup>a</sup> Stirring time of concentrated solution, <sup>b</sup> the time between dilution and spin-coating.

### 3. Calculation of the surface compositions

$$\begin{aligned} \text{PTB7 weight content} &= \frac{\text{Polymer weight}}{\text{Polymer weight} + \text{PCBM weight}} \\ &= \frac{n_{\text{polymer}} M_{\text{polymer}}}{n_{\text{polymer}} M_{\text{polymer}} + n_{\text{PCBM}} M_{\text{PCBM}}} \\ &= \frac{1}{1 + \frac{n_{\text{PCBM}} M_{\text{PCBM}}}{n_{\text{polymer}} M_{\text{polymer}}}} \end{aligned}$$

$$\frac{4n_{\text{polymer}} + 2n_{\text{PCBM}}}{4n_{\text{polymer}}} = \frac{O}{S}$$

$$\frac{n_{\text{PCBM}}}{n_{\text{polymer}}} = 2 \left( \frac{O}{S} - 1 \right) = 2 \frac{O}{S} - 2$$

$$\text{PTB7 weight content} = \frac{1}{\left( \frac{M_{\text{PCBM}}}{M_{\text{polymer}}} \right) \left( 2 \frac{O}{S} - 2 \right) + 1}$$

$M_{\text{PCBM}}$  is the molecular weight of PC<sub>71</sub>BM (1016);

$M_{\text{polymer}}$  is the molecular weight of repeat unit of PTB7 (714);

$n_{\text{PCBM}}$  is the mole number of PC<sub>71</sub>BM;

$n_{\text{polymer}}$  is the mole number of repeat unit of PTB7;

$\frac{O}{S}$  is the atom ratio of O/S.
